# Supplementary material
Source: PubMed Central journal article supplement (PMC3626826)
Supplement: supp_111861_tobacco-mecredy-1-at.pdf [file supp_111861_tobacco-mecredy-1-at.pdf]

**Appendix 1 (as supplied by the authors): Unadjusted and adjusted effects of each covariate in the logistic models from Table 2**

| Baseline variables*                               | Quit attempt         |                     |                     |                     | 30-day cessation     |                     |                     |                     | Long-term cessation |                     |
|---------------------------------------------------|----------------------|---------------------|---------------------|---------------------|----------------------|---------------------|---------------------|---------------------|---------------------|---------------------|
|                                                   | 6-months OR (95% CI) |                     | 1 year OR (95% CI)  |                     | 6-months OR (95% CI) |                     | 1 year OR (95% CI)  |                     | OR (95% CI)         |                     |
|                                                   | Unadjusted           | Adjusted†           | Unadjusted          | Adjusted†           | Unadjusted           | Adjusted†           | Unadjusted          | Adjusted†           | Unadjusted          | Adjusted†           |
| <b>Demographics</b>                               |                      |                     |                     |                     |                      |                     |                     |                     |                     |                     |
| Age                                               |                      |                     |                     |                     |                      |                     |                     |                     |                     |                     |
| 18–29 (ref)                                       | 1.00                 | 1.00                | 1.00                | 1.00                | 1.00                 | 1.00                | 1.00                | 1.00                | 1.00                | 1.00                |
| 30–44                                             | 0.52<br>(0.37–0.72)  | 0.47<br>(0.31–0.72) | 0.52<br>(0.38–0.71) | 0.56<br>(0.37–0.86) | 0.59<br>(0.36–0.96)  | 0.56<br>(0.31–1.00) | 0.75<br>(0.51–1.11) | 0.77<br>(0.47–1.25) | 1.11<br>(0.47–2.63) | 1.09<br>(0.38–3.15) |
| 45–59                                             | 0.51<br>(0.37–0.70)  | 0.73<br>(0.44–1.21) | 0.47<br>(0.35–0.65) | 0.76<br>(0.48–1.21) | 0.55<br>(0.33–0.90)  | 0.89<br>(0.43–1.78) | 0.62<br>(0.42–0.92) | 0.90<br>(0.52–1.55) | 0.88<br>(0.36–2.14) | 0.97<br>(0.29–3.26) |
| 60+                                               | 0.55<br>(0.36–0.86)  | 1.15<br>(0.55–2.39) | 0.51<br>(0.34–0.76) | 1.17<br>(0.62–2.19) | 0.67<br>(0.36–1.25)  | 1.15<br>(0.44–3.00) | 0.64<br>(0.39–1.07) | 0.95<br>(0.42–2.15) | 1.32<br>(0.44–4.03) | 1.48<br>(0.25–8.78) |
| Gender                                            |                      |                     |                     |                     |                      |                     |                     |                     |                     |                     |
| Female (ref)                                      | 1.00                 | 1.00                | 1.00                | 1.00                | 1.00                 | 1.00                | 1.00                | 1.00                | 1.00                | 1.00                |
| Male                                              | 1.07<br>(0.85–1.35)  | 0.96<br>(0.72–1.28) | 1.15<br>(0.93–1.42) | 1.01<br>(0.78–1.31) | 0.88<br>(0.61–1.27)  | 0.77<br>(0.51–1.17) | 0.93<br>(0.70–1.23) | 0.83<br>(0.59–1.17) | 1.52<br>(0.87–2.66) | 1.62<br>(0.86–3.06) |
| Education                                         |                      |                     |                     |                     |                      |                     |                     |                     |                     |                     |
| Less than high school (ref)                       | 1.00                 | 1.00                | 1.00                | 1.00                | 1.00                 | 1.00                | 1.00                | 1.00                | 1.00                | 1.00                |
| Completed high school and some college/university | 1.03<br>(0.74–1.43)  | 0.78<br>(0.51–1.20) | 1.17<br>(0.87–1.58) | 0.95<br>(0.63–1.43) | 1.68<br>(1.03–2.73)  | 1.40<br>(0.76–2.59) | 1.57<br>(1.04–2.35) | 1.28<br>(0.73–2.22) | 2.73<br>(1.26–5.89) | 2.73<br>(0.93–7.99) |
| Completed college                                 | 1.10<br>(0.79–1.52)  | 0.83<br>(0.54–1.26) | 1.28<br>(0.95–1.73) | 1.00<br>(0.67–1.50) | 2.22<br>(1.37–3.62)  | 1.79<br>(1.02–3.14) | 2.11<br>(1.42–3.15) | 1.64<br>(0.96–2.79) | 3.48<br>(1.61–7.54) | 3.30<br>(1.23–8.83) |
| Rurality                                          |                      |                     |                     |                     |                      |                     |                     |                     |                     |                     |
| Urban (ref)                                       | 1.00                 | 1.00                | 1.00                | 1.00                | 1.00                 | 1.00                | 1.00                | 1.00                | 1.00                | 1.00                |
| Rural                                             | 0.85<br>(0.67–1.08)  | 0.85<br>(0.63–1.15) | 0.87<br>(0.71–1.08) | 0.97<br>(0.74–1.26) | 0.66<br>(0.45–0.97)  | 0.69<br>(0.44–1.11) | 0.70<br>(0.52–0.94) | 0.71<br>(0.49–1.03) | 0.58<br>(0.29–1.17) | 0.44<br>(0.19–1.00) |
| % of neighbourhood below LICO                     | 0.99<br>(0.98–1.01)  | 1.00<br>(0.99–1.02) | 1.00<br>(0.99–1.01) | 1.01<br>(0.99–1.02) | 1.00<br>(0.98–1.02)  | 1.01<br>(0.99–1.03) | 0.99<br>(0.98–1.01) | 1.00<br>(0.98–1.01) | 1.00<br>(0.97–1.03) | 1.01<br>(0.98–1.04) |

Appendix to: Mecredy GC, Diemert LM, Callaghan RC, et al. Association between use of contraband tobacco and smoking cessation outcomes: a population-based cohort study.

CMAJ 2013; DOI:10.1503/cmaj.111861.

Copyright © 2013 Canadian Medical Association or its licensors

|                                  |                     |                     |                     |                     |                     |                     |                     |                     |                     |                      |
|----------------------------------|---------------------|---------------------|---------------------|---------------------|---------------------|---------------------|---------------------|---------------------|---------------------|----------------------|
| Survey year                      |                     |                     |                     |                     |                     |                     |                     |                     |                     |                      |
| 2005 (ref)                       | 1.00                | 1.00                | 1.00                | 1.00                | 1.00                | 1.00                | 1.00                | 1.00                | 1.00                | 1.00                 |
| 2006                             | 0.77<br>(0.55–1.07) | 0.67<br>(0.45–1.00) | 0.95<br>(0.69–1.31) | 0.95<br>(0.65–1.39) | 0.87<br>(0.52–1.46) | 0.85<br>(0.46–1.57) | 1.24<br>(0.81–1.87) | 1.27<br>(0.77–2.09) | 0.86<br>(0.36–2.07) | 0.77<br>(0.33–1.83)  |
| 2007                             | 0.59<br>(0.42–0.83) | 0.53<br>(0.35–0.80) | 0.63<br>(0.45–0.86) | 0.56<br>(0.38–0.82) | 0.85<br>(0.50–1.44) | 0.88<br>(0.47–1.63) | 0.88<br>(0.58–1.35) | 0.80<br>(0.48–1.33) | 1.25<br>(0.52–3.02) | 1.13<br>(0.45–2.86)  |
| 2008                             | 0.51<br>(0.34–0.77) | 0.46<br>(0.28–0.77) | 0.60<br>(0.42–0.87) | 0.61<br>(0.39–0.96) | 0.63<br>(0.35–1.15) | 0.72<br>(0.35–1.50) | 0.87<br>(0.54–1.38) | 0.95<br>(0.54–1.67) | 0.75<br>(0.29–1.94) | 0.85<br>(0.30–2.48)  |
| <b>Smoker characteristics</b>    |                     |                     |                     |                     |                     |                     |                     |                     |                     |                      |
| Usually buy on reserve           |                     |                     |                     |                     |                     |                     |                     |                     |                     |                      |
| No (ref)                         | 1.00                | 1.00                | 1.00                | 1.00                | 1.00                | 1.00                | 1.00                | 1.00                | 1.00                | 1.00                 |
| Yes                              | 0.71<br>(0.51–1.00) | 1.70<br>(0.96–3.01) | 0.57<br>(0.43–0.77) | 1.05<br>(0.63–1.74) | 0.76<br>(0.43–1.36) | 3.85<br>(1.78–8.33) | 0.63<br>(0.41–0.99) | 2.68<br>(1.38–5.17) | 0.72<br>(0.31–1.72) | 3.97<br>(0.91–17.33) |
| Pack-years                       | 0.98<br>(0.97–0.99) | 0.99<br>(0.97–1.00) | 0.98<br>(0.97–0.99) | 0.99<br>(0.98–1.00) | 0.97<br>(0.96–0.99) | 1.01<br>(1.00–1.02) | 0.97<br>(0.96–0.98) | 1.00<br>(0.99–1.02) | 0.99<br>(0.97–1.01) | 1.02<br>(1.00–1.04)  |
| Heaviness of smoking index       |                     |                     |                     |                     |                     |                     |                     |                     |                     |                      |
| Low (ref)                        | 1.00                | 1.00                | 1.00                | 1.00                | 1.00                | 1.00                | 1.00                | 1.00                | 1.00                | 1.00                 |
| Moderate                         | 0.48<br>(0.37–0.61) | 0.70<br>(0.49–1.00) | 0.47<br>(0.37–0.59) | 0.70<br>(0.50–0.98) | 0.30<br>(0.20–0.45) | 0.43<br>(0.26–0.70) | 0.32<br>(0.23–0.44) | 0.50<br>(0.33–0.76) | 0.36<br>(0.19–0.66) | 0.46<br>(0.22–0.94)  |
| High                             | 0.50<br>(0.34–0.72) | 0.96<br>(0.50–1.86) | 0.44<br>(0.31–0.62) | 0.87<br>(0.47–1.61) | 0.19<br>(0.10–0.35) | 0.36<br>(0.14–0.95) | 0.18<br>(0.10–0.32) | 0.30<br>(0.14–0.67) | 0.17<br>(0.05–0.53) | 0.10<br>(0.01–0.70)  |
| Intention to quit                |                     |                     |                     |                     |                     |                     |                     |                     |                     |                      |
| No (ref)                         | 1.00                | 1.00                | 1.00                | 1.00                | 1.00                | 1.00                | 1.00                | 1.00                | 1.00                | 1.00                 |
| Yes                              | 4.79(3.72–6.16)     | 4.14<br>(3.12–5.50) | 4.71<br>(3.74–5.92) | 3.91<br>(3.03–5.05) | 3.21<br>(2.19–4.71) | 3.02<br>(1.96–4.64) | 3.18<br>(2.37–4.26) | 3.15<br>(2.20–4.49) | 2.92<br>(1.58–5.38) | 2.96<br>(1.58–5.56)  |
| Number of lifetime quit attempts |                     |                     |                     |                     |                     |                     |                     |                     |                     |                      |
| 0 (ref)                          | 1.00                | 1.00                | 1.00                | 1.00                | 1.00                | 1.00                | 1.00                | 1.00                | 1.00                | 1.00                 |
| 1                                | 1.81<br>(1.12–2.93) | 1.47<br>(0.84–2.58) | 1.35<br>(0.90–2.00) | 1.34<br>(0.80–2.23) | 1.67<br>(0.82–3.40) | 1.94<br>(0.76–4.98) | 1.31<br>(0.79–2.19) | 1.37<br>(0.70–2.66) | 1.90<br>(0.68–5.27) | 2.41<br>(0.68–10.00) |
| 2+                               | 2.87<br>(1.88–4.39) | 2.28<br>(1.37–3.77) | 2.09<br>(1.48–2.96) | 1.93<br>(1.20–3.09) | 1.61<br>(0.86–3.02) | 1.93<br>(0.83–4.50) | 1.23<br>(0.79–1.92) | 1.14<br>(0.63–2.08) | 1.36<br>(0.56–3.27) | 1.76<br>(0.53–5.85)  |
| Perceived                        |                     |                     |                     |                     |                     |                     |                     |                     |                     |                      |

Appendix to: Mecredy GC, Diemert LM, Callaghan RC, et al. Association between use of contraband tobacco and smoking cessation outcomes: a population-based cohort study.

CMAJ 2013; DOI:10.1503/cmaj.111861.

Copyright © 2013 Canadian Medical Association or its licensors

|                                                |                     |                     |                     |                     |                     |                     |                     |                     |                     |                     |
|------------------------------------------------|---------------------|---------------------|---------------------|---------------------|---------------------|---------------------|---------------------|---------------------|---------------------|---------------------|
| addiction                                      |                     |                     |                     |                     |                     |                     |                     |                     |                     |                     |
| Not at all (ref)                               | 1.00                | 1.00                | 1.00                | 1.00                | 1.00                | 1.00                | 1.00                | 1.00                | 1.00                | 1.00                |
| Somewhat                                       | 1.10<br>(0.68–1.79) | 0.86<br>(0.46–1.61) | 1.25<br>(0.78–2.00) | 1.17<br>(0.63–2.17) | 0.63<br>(0.35–1.11) | 0.47<br>(0.22–0.99) | 0.66<br>(0.40–1.08) | 0.60<br>(0.31–1.14) | 0.92<br>(0.38–2.22) | 0.90<br>(0.32–2.52) |
| Very                                           | 0.78<br>(0.50–1.24) | 0.77<br>(0.41–1.45) | 0.80<br>(0.52–1.24) | 1.02<br>(0.55–1.88) | 0.25<br>(0.15–0.42) | 0.27<br>(0.13–0.55) | 0.27<br>(0.17–0.43) | 0.31<br>(0.16–0.60) | 0.40<br>(0.17–0.94) | 0.39<br>(0.13–1.11) |
| Have someone to support a quit                 |                     |                     |                     |                     |                     |                     |                     |                     |                     |                     |
| No (ref)                                       | 1.00                | 1.00                | 1.00                | 1.00                | 1.00                | 1.00                | 1.00                | 1.00                | 1.00                | 1.00                |
| Yes                                            | 1.24<br>(0.89–1.73) | 1.61<br>(1.09–2.37) | 1.33<br>(1.00–1.79) | 1.55<br>(1.07–2.26) | 1.31<br>(0.74–2.35) | 1.33<br>(0.72–2.44) | 1.27<br>(0.82–1.96) | 1.12<br>(0.65–1.92) | 0.92<br>(0.37–2.26) | 1.16<br>(0.47–2.85) |
| Have someone who would make quitting difficult |                     |                     |                     |                     |                     |                     |                     |                     |                     |                     |
| No (ref)                                       | 1.00                | 1.00                | 1.00                | 1.00                | 1.00                | 1.00                | 1.00                | 1.00                | 1.00                | 1.00                |
| Yes                                            | 1.43<br>(1.13–1.81) | 1.23<br>(0.91–1.66) | 1.43<br>(1.15–1.77) | 1.33<br>(1.00–1.77) | 0.93<br>(0.65–1.35) | 0.92<br>(0.57–1.45) | 0.96<br>(0.72–1.27) | 0.91<br>(0.64–1.30) | 0.39<br>(0.22–0.70) | 0.45<br>(0.21–0.97) |
| People smoke at home                           |                     |                     |                     |                     |                     |                     |                     |                     |                     |                     |
| No (ref)                                       | 1.00                | 1.00                | 1.00                | 1.00                | 1.00                | 1.00                | 1.00                | 1.00                | 1.00                | 1.00                |
| Yes                                            | 0.51<br>(0.40–0.64) | 0.68<br>(0.51–0.92) | 0.50<br>(0.41–0.62) | 0.66<br>(0.50–0.87) | 0.37<br>(0.26–0.54) | 0.54<br>(0.33–0.88) | 0.41<br>(0.31–0.54) | 0.63<br>(0.44–0.90) | 0.47<br>(0.25–0.90) | 0.74<br>(0.35–1.58) |
| <b>Use/knowledge of stop smoking resources</b> |                     |                     |                     |                     |                     |                     |                     |                     |                     |                     |
| Ever used pharmacotherapy                      |                     |                     |                     |                     |                     |                     |                     |                     |                     |                     |
| No (ref)                                       | 1.00                | 1.00                | 1.00                | 1.00                | 1.00                | 1.00                | 1.00                | 1.00                | 1.00                | 1.00                |
| Yes                                            | 1.32<br>(1.03–1.67) | 1.26<br>(0.91–1.74) | 1.21<br>(0.97–1.50) | 1.25<br>(0.92–1.70) | 0.64<br>(0.44–0.91) | 0.84<br>(0.55–1.26) | 0.78<br>(0.59–1.04) | 1.20<br>(0.82–1.75) | 0.75<br>(0.41–1.34) | 0.99<br>(0.56–1.73) |
| Cost of pharmacotherapy is high                |                     |                     |                     |                     |                     |                     |                     |                     |                     |                     |
| No (ref)                                       | 1.00                | 1.00                | 1.00                | 1.00                | 1.00                | 1.00                | 1.00                | 1.00                | 1.00                | 1.00                |
| Yes                                            | 0.87<br>(0.68–1.10) | 0.78<br>(0.58–1.06) | 0.81<br>(0.65–1.01) | 0.74<br>(0.56–0.97) | 0.86<br>(0.60–1.25) | 0.87<br>(0.56–1.35) | 0.83<br>(0.62–1.11) | 0.86<br>(0.61–1.22) | 0.77<br>(0.42–1.40) | 1.27<br>(0.67–2.39) |
| Pharmacotherapy                                |                     |                     |                     |                     |                     |                     |                     |                     |                     |                     |

Appendix to: Mecredy GC, Diemert LM, Callaghan RC, et al. Association between use of contraband tobacco and smoking cessation outcomes: a population-based cohort study.

CMAJ 2013; DOI:10.1503/cmaj.111861.

Copyright © 2013 Canadian Medical Association or its licensors

|                                                                                                                                                                                                                                                                                                                                                                                             |                            |                            |                            |                            |                            |                            |                            |                            |                            |                            |
|---------------------------------------------------------------------------------------------------------------------------------------------------------------------------------------------------------------------------------------------------------------------------------------------------------------------------------------------------------------------------------------------|----------------------------|----------------------------|----------------------------|----------------------------|----------------------------|----------------------------|----------------------------|----------------------------|----------------------------|----------------------------|
| is hard to access                                                                                                                                                                                                                                                                                                                                                                           |                            |                            |                            |                            |                            |                            |                            |                            |                            |                            |
| No (ref)                                                                                                                                                                                                                                                                                                                                                                                    | 1.00                       | 1.00                       | 1.00                       | 1.00                       | 1.00                       | 1.00                       | 1.00                       | 1.00                       | 1.00                       | 1.00                       |
| Yes                                                                                                                                                                                                                                                                                                                                                                                         | <b>0.49</b><br>(0.27–0.86) | <b>0.39</b><br>(0.19–0.78) | <b>0.78</b><br>(0.46–1.32) | <b>0.82</b><br>(0.39–1.75) | <b>0.73</b><br>(0.30–1.74) | <b>0.63</b><br>(0.21–1.95) | <b>0.89</b><br>(0.47–1.69) | <b>0.93</b><br>(0.36–2.36) | <b>0.64</b><br>(0.13–3.19) | <b>0.73</b><br>(0.10–5.41) |
| Ever used counselling                                                                                                                                                                                                                                                                                                                                                                       |                            |                            |                            |                            |                            |                            |                            |                            |                            |                            |
| No (ref)                                                                                                                                                                                                                                                                                                                                                                                    | 1.00                       | 1.00                       | 1.00                       | 1.00                       | 1.00                       | 1.00                       | 1.00                       | 1.00                       | 1.00                       | 1.00                       |
| Yes                                                                                                                                                                                                                                                                                                                                                                                         | <b>1.62</b><br>(1.02–2.58) | <b>1.62</b><br>(0.89–2.93) | <b>1.35</b><br>(0.87–2.08) | <b>1.28</b><br>(0.73–2.25) | <b>1.44</b><br>(0.68–3.07) | <b>1.93</b><br>(0.74–5.08) | <b>1.03</b><br>(0.55–1.92) | <b>1.20</b><br>(0.51–2.79) | <b>0.93</b><br>(0.34–2.55) | <b>1.44</b><br>(0.51–4.07) |
| Cost of counselling is high                                                                                                                                                                                                                                                                                                                                                                 |                            |                            |                            |                            |                            |                            |                            |                            |                            |                            |
| No (ref)                                                                                                                                                                                                                                                                                                                                                                                    | 1.00                       | 1.00                       | 1.00                       | 1.00                       | 1.00                       | 1.00                       | 1.00                       | 1.00                       | 1.00                       | 1.00                       |
| Yes                                                                                                                                                                                                                                                                                                                                                                                         | <b>0.92</b><br>(0.71–1.19) | <b>0.78</b><br>(0.55–1.10) | <b>1.00</b><br>(0.79–1.27) | <b>0.90</b><br>(0.65–1.23) | <b>0.86</b><br>(0.58–1.28) | <b>0.87</b><br>(0.53–1.41) | <b>0.91</b><br>(0.67–1.25) | <b>0.98</b><br>(0.67–1.45) | <b>0.53</b><br>(0.27–1.05) | <b>0.41</b><br>(0.19–0.87) |
| Counseling is hard to access                                                                                                                                                                                                                                                                                                                                                                |                            |                            |                            |                            |                            |                            |                            |                            |                            |                            |
| No (ref)                                                                                                                                                                                                                                                                                                                                                                                    | 1.00                       | 1.00                       | 1.00                       | 1.00                       | 1.00                       | 1.00                       | 1.00                       | 1.00                       | 1.00                       | 1.00                       |
| Yes                                                                                                                                                                                                                                                                                                                                                                                         | <b>1.28</b><br>(0.93–1.77) | <b>1.62</b><br>(1.05–2.48) | <b>1.17</b><br>(0.87–1.57) | <b>1.23</b><br>(0.81–1.87) | <b>0.93</b><br>(0.57–1.53) | <b>0.88</b><br>(0.47–1.63) | <b>0.92</b><br>(0.63–1.35) | <b>0.91</b><br>(0.55–1.52) | <b>1.16</b><br>(0.55–2.48) | <b>1.84</b><br>(0.77–4.41) |
| <p>Note: CI = confidence interval, ref = reference category, OR = relative risk, bold numbers indicate a significant effect<br/> *Sample sizes for unadjusted analyses were 2786 overall, 2421 for premium/discount brands, and 365 for contraband cigarettes; sample sizes for adjusted analyses were 2310, 2029 and 281 respectively.<br/> †Adjusted for all covariates from Table 1.</p> |                            |                            |                            |                            |                            |                            |                            |                            |                            |                            |
