# Supplementary material
Source: PubMed Central journal article supplement (PMC3626826)
Supplement: supp_111861_tobacco-mecredy-2-at.pdf [file supp_111861_tobacco-mecredy-2-at.pdf]

**Appendix 2 (as supplied by the authors): Price increase per pack of cigarettes from baseline as a predictor of cessation outcomes at 6 months and 1 year**

| Outcome                                                                                                                                                                                            | Risk associated with a \$1 increase per 20 cigarettes, RR (95% CI)* |                  |
|----------------------------------------------------------------------------------------------------------------------------------------------------------------------------------------------------|---------------------------------------------------------------------|------------------|
|                                                                                                                                                                                                    | Unadjusted                                                          | Adjusted†        |
| <b>Attempt to quit</b>                                                                                                                                                                             |                                                                     |                  |
| 6 mo                                                                                                                                                                                               | 1.08 (1.02–1.14)                                                    | 1.06 (0.98–1.15) |
| 1 yr                                                                                                                                                                                               | 1.09 (1.04–1.15)                                                    | 1.04 (0.98–1.11) |
| <b>30-day cessation</b>                                                                                                                                                                            |                                                                     |                  |
| 6 mo                                                                                                                                                                                               | 1.08 (0.99–1.17)                                                    | 1.06 (0.98–1.15) |
| 1 yr                                                                                                                                                                                               | 1.10 (0.99–1.22)                                                    | 1.07 (0.98–1.15) |
| <b>Long-term cessation</b>                                                                                                                                                                         |                                                                     |                  |
| 1 yr                                                                                                                                                                                               | 1.11 (0.97–1.27)                                                    | 1.12 (1.01–1.25) |
| Note: CI = confidence interval, RR = relative risk.<br>*Sample size for unadjusted analyses was 881; sample size for adjusted analyses was 721.<br>†Adjusted for all covariates listed in Table 1. |                                                                     |                  |
